# Supplementary material for: Critical role of the finger loop in arrestin binding to the receptors
Source: PLOS journal article supplement (doi:10.1371/journal.pone.0213792), 2019-03-15
Supplement: S1 (10.1371/journal.pone.0213792.s001) [file journal.pone.0213792.s001]

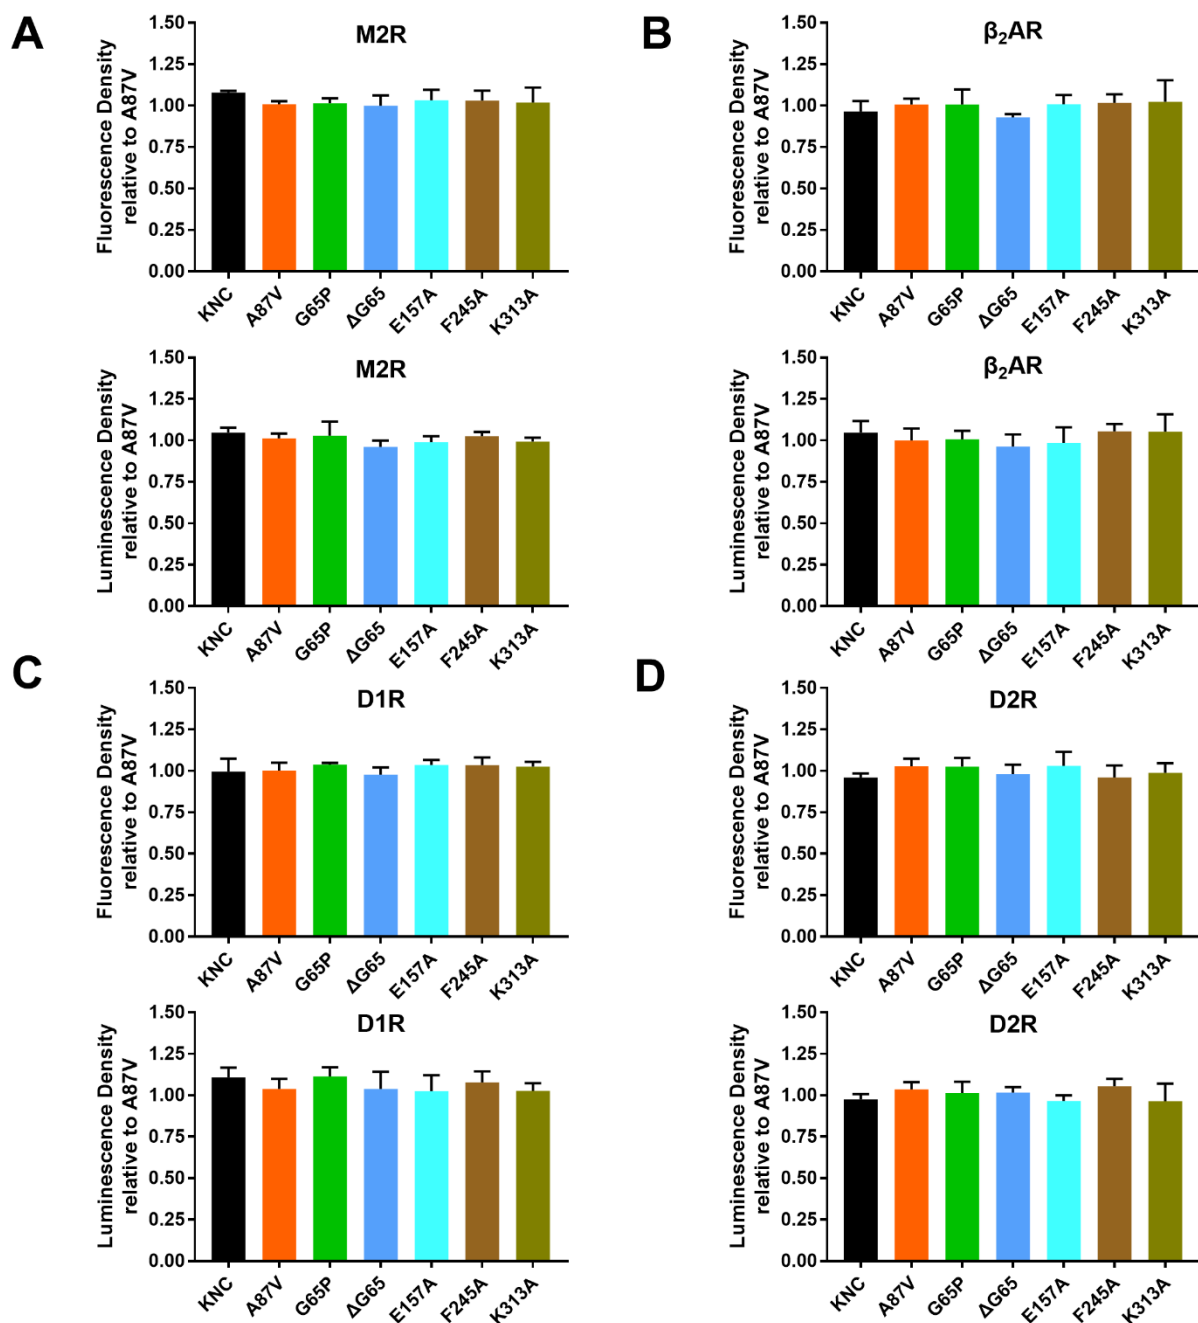

Suppl. Fig. 1. Expression of Venus-arrestin and receptor-*Rluc8*. The expression of Venus-arrestin and receptor-*Rluc8* were evaluated by the fluorescence and the basal luminescence density, respectively. The expression level was normalized to the A87V base mutant, as follows: M2R (A),  $\beta_2$ AR(B), D1R(C), D2R(D).
